# Supplementary material for: Chemical Constituents and Their Production in Mexican Oaks (Q. Rugosa, Q. Glabrescens and Q. Obtusata)
Source: MDPI journal article supplement (doi:10.3390/plants11192610), 2022-10-04
Supplement: s1 [file s1]

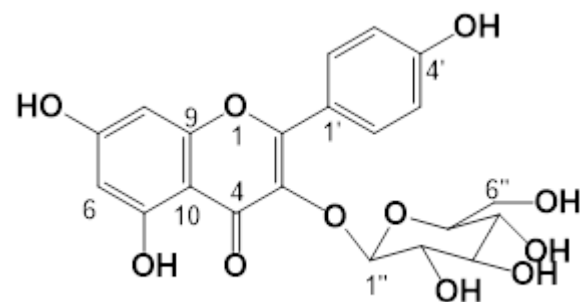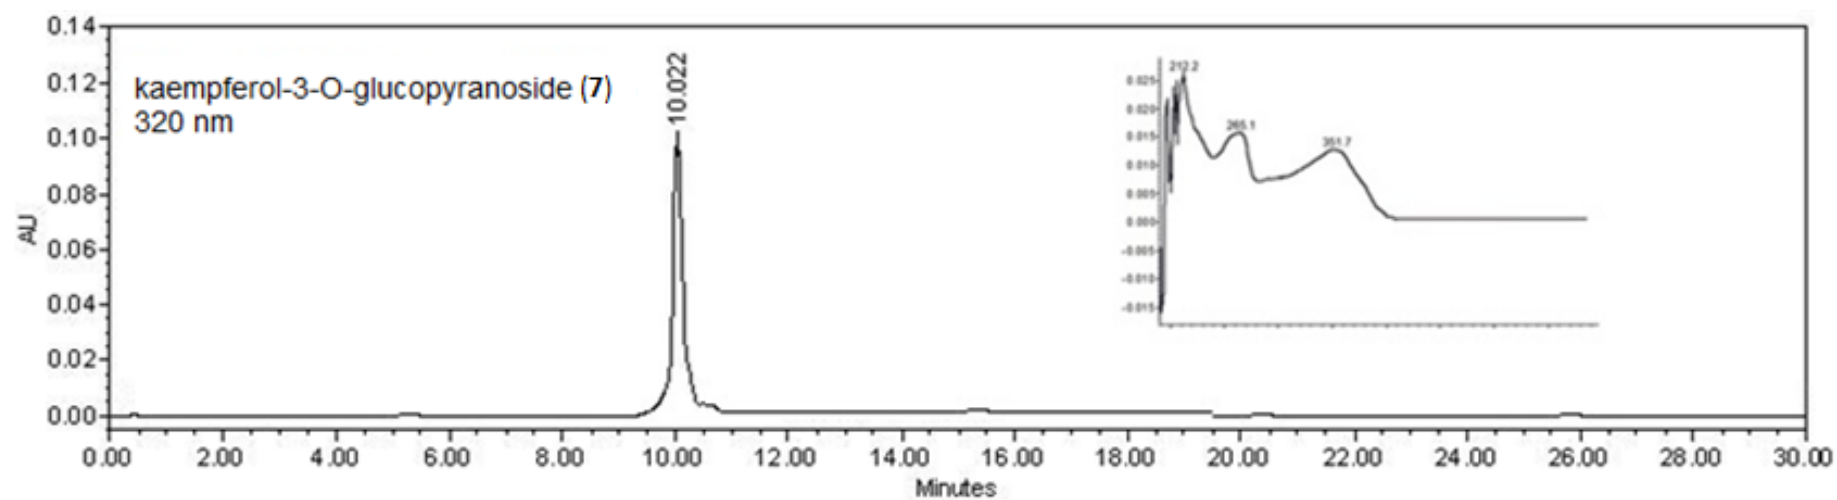

Figure S1a

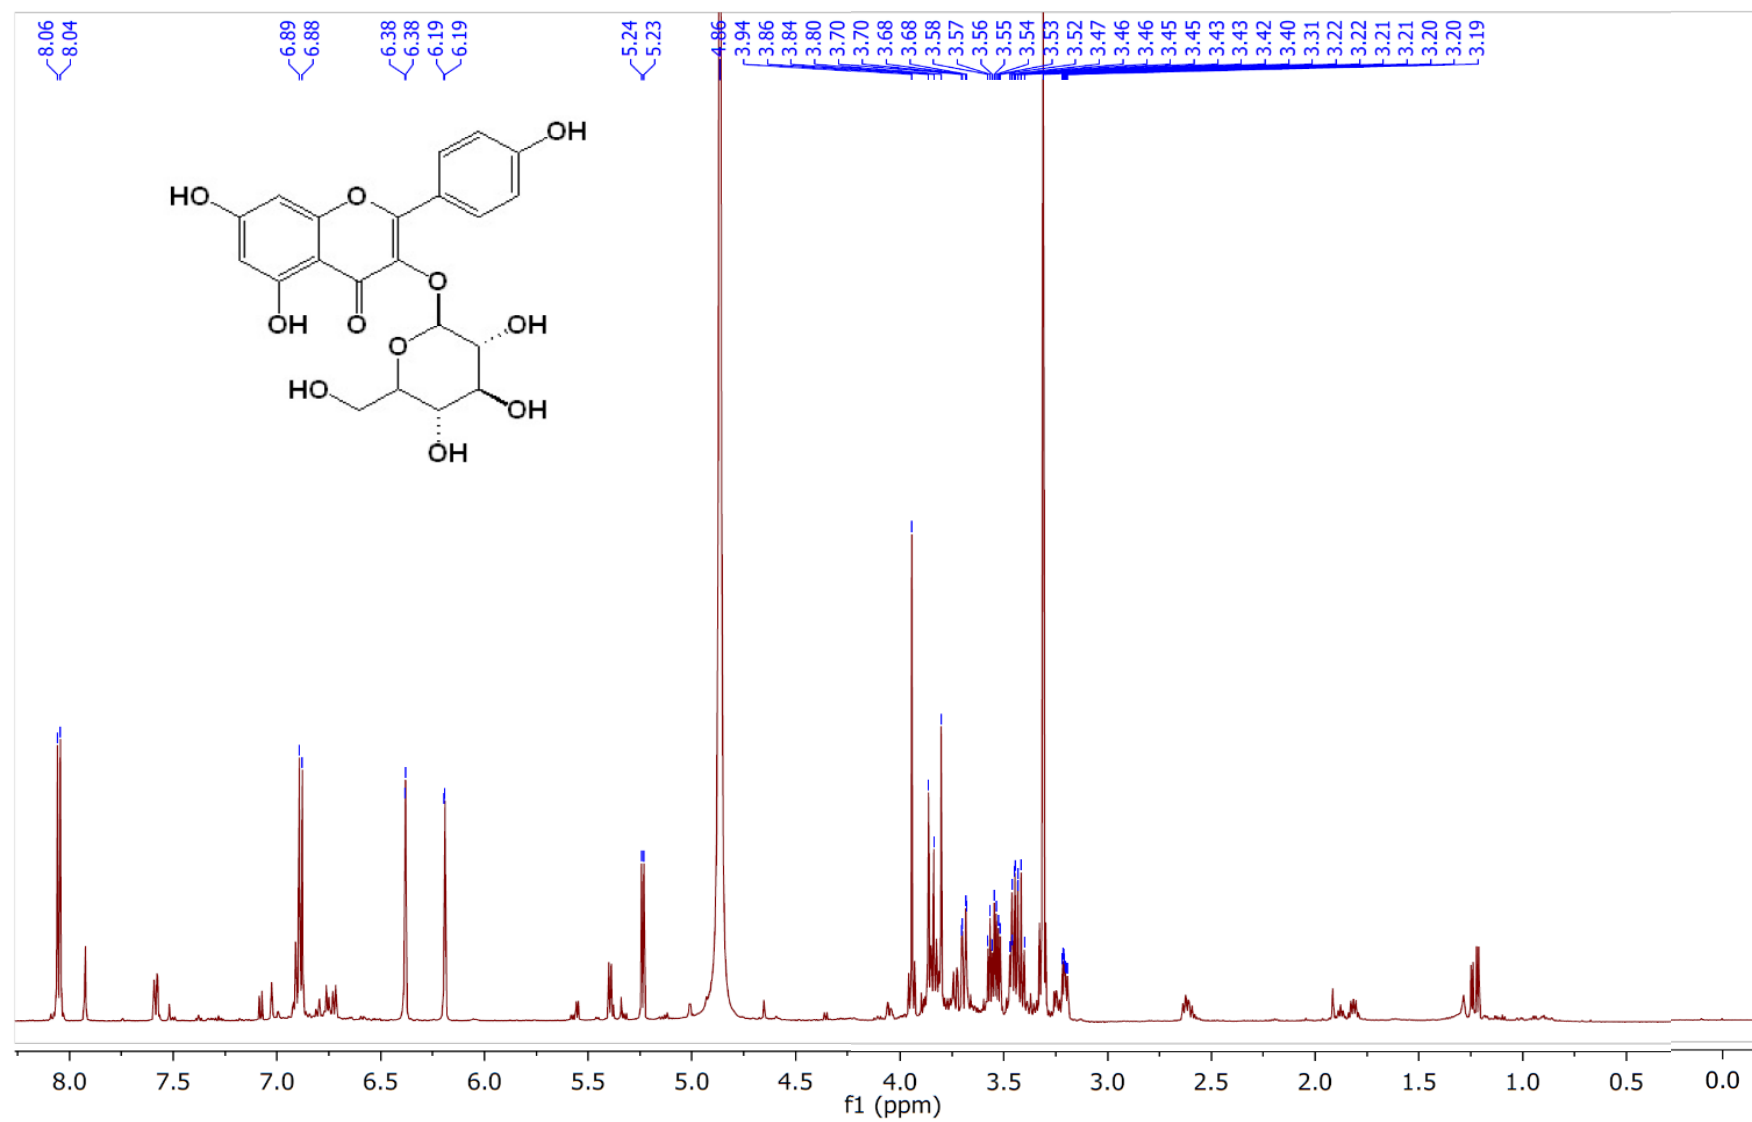

Figure S1b

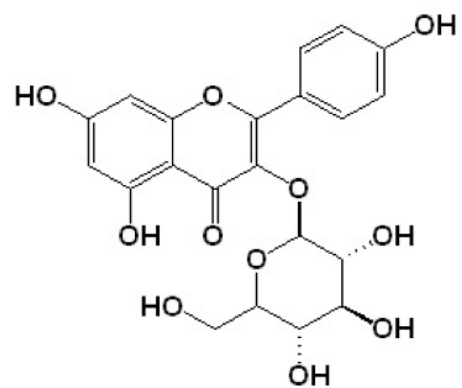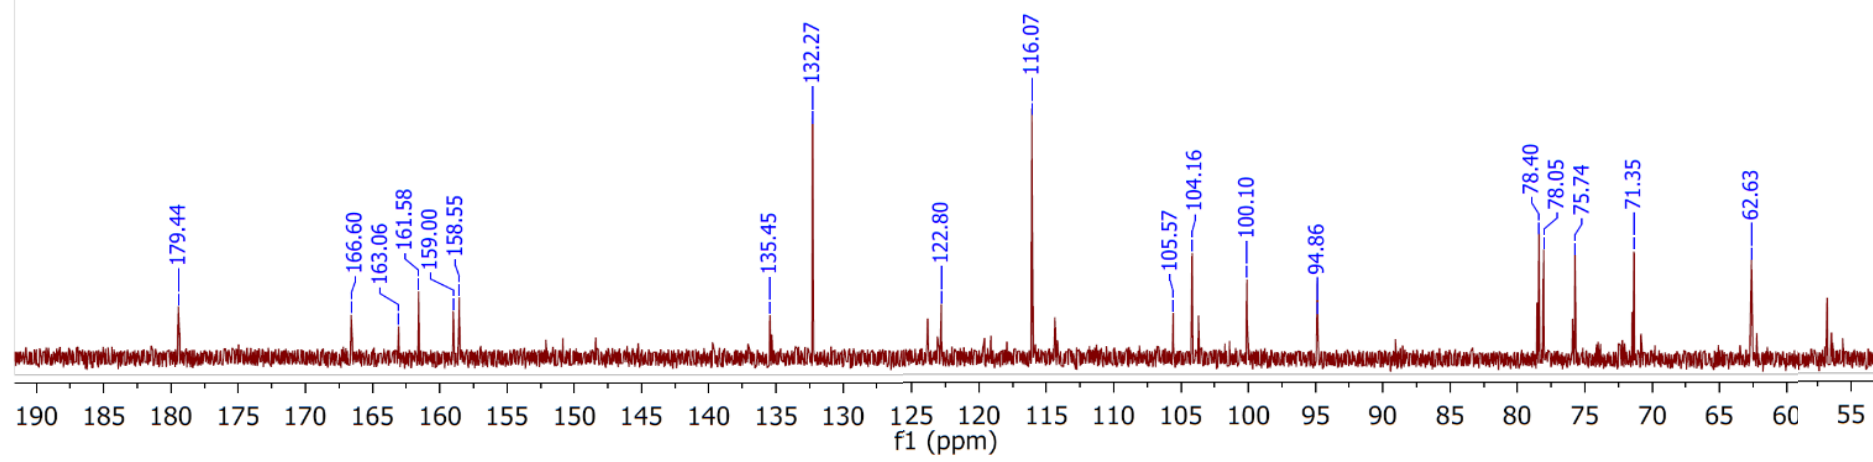

Figure S1c

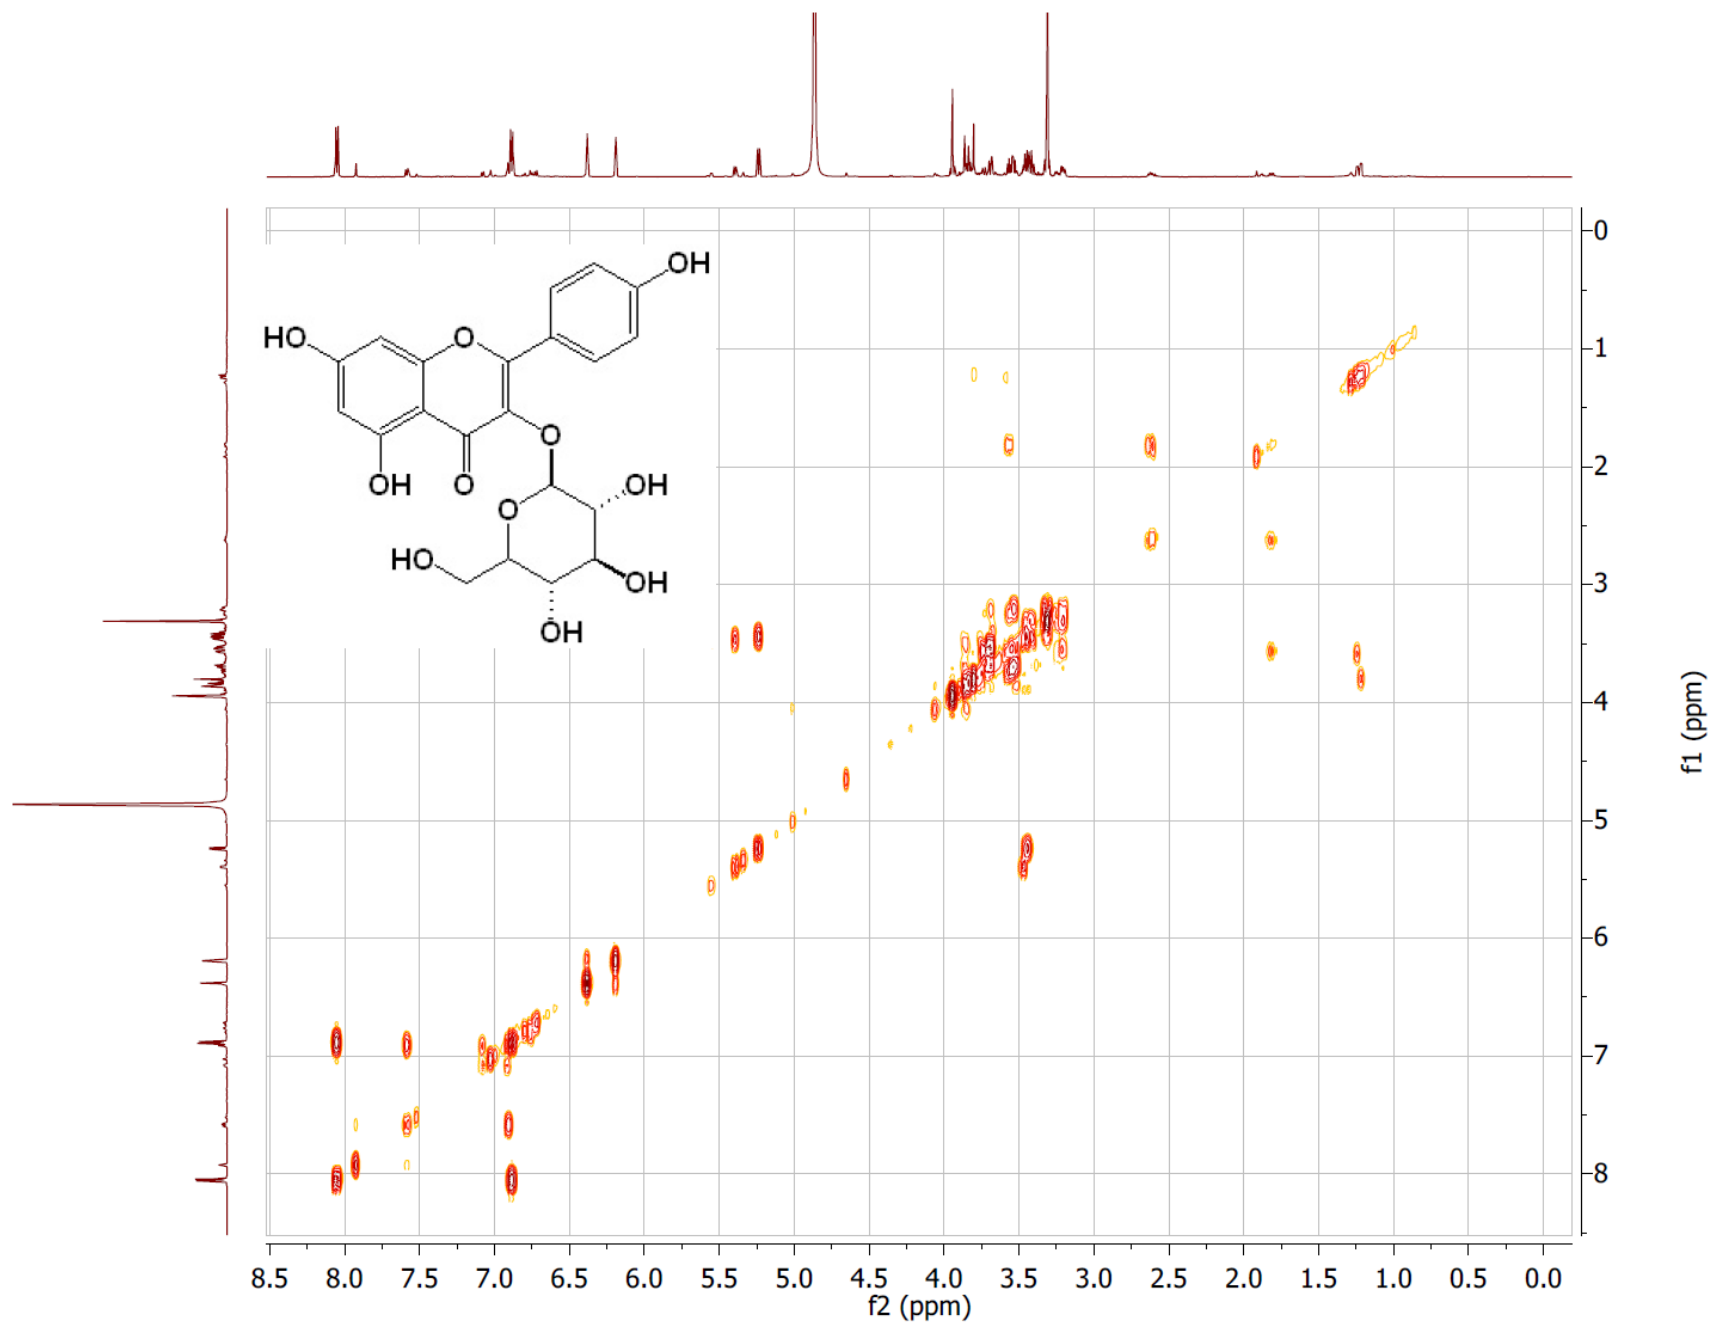

Figure S1d

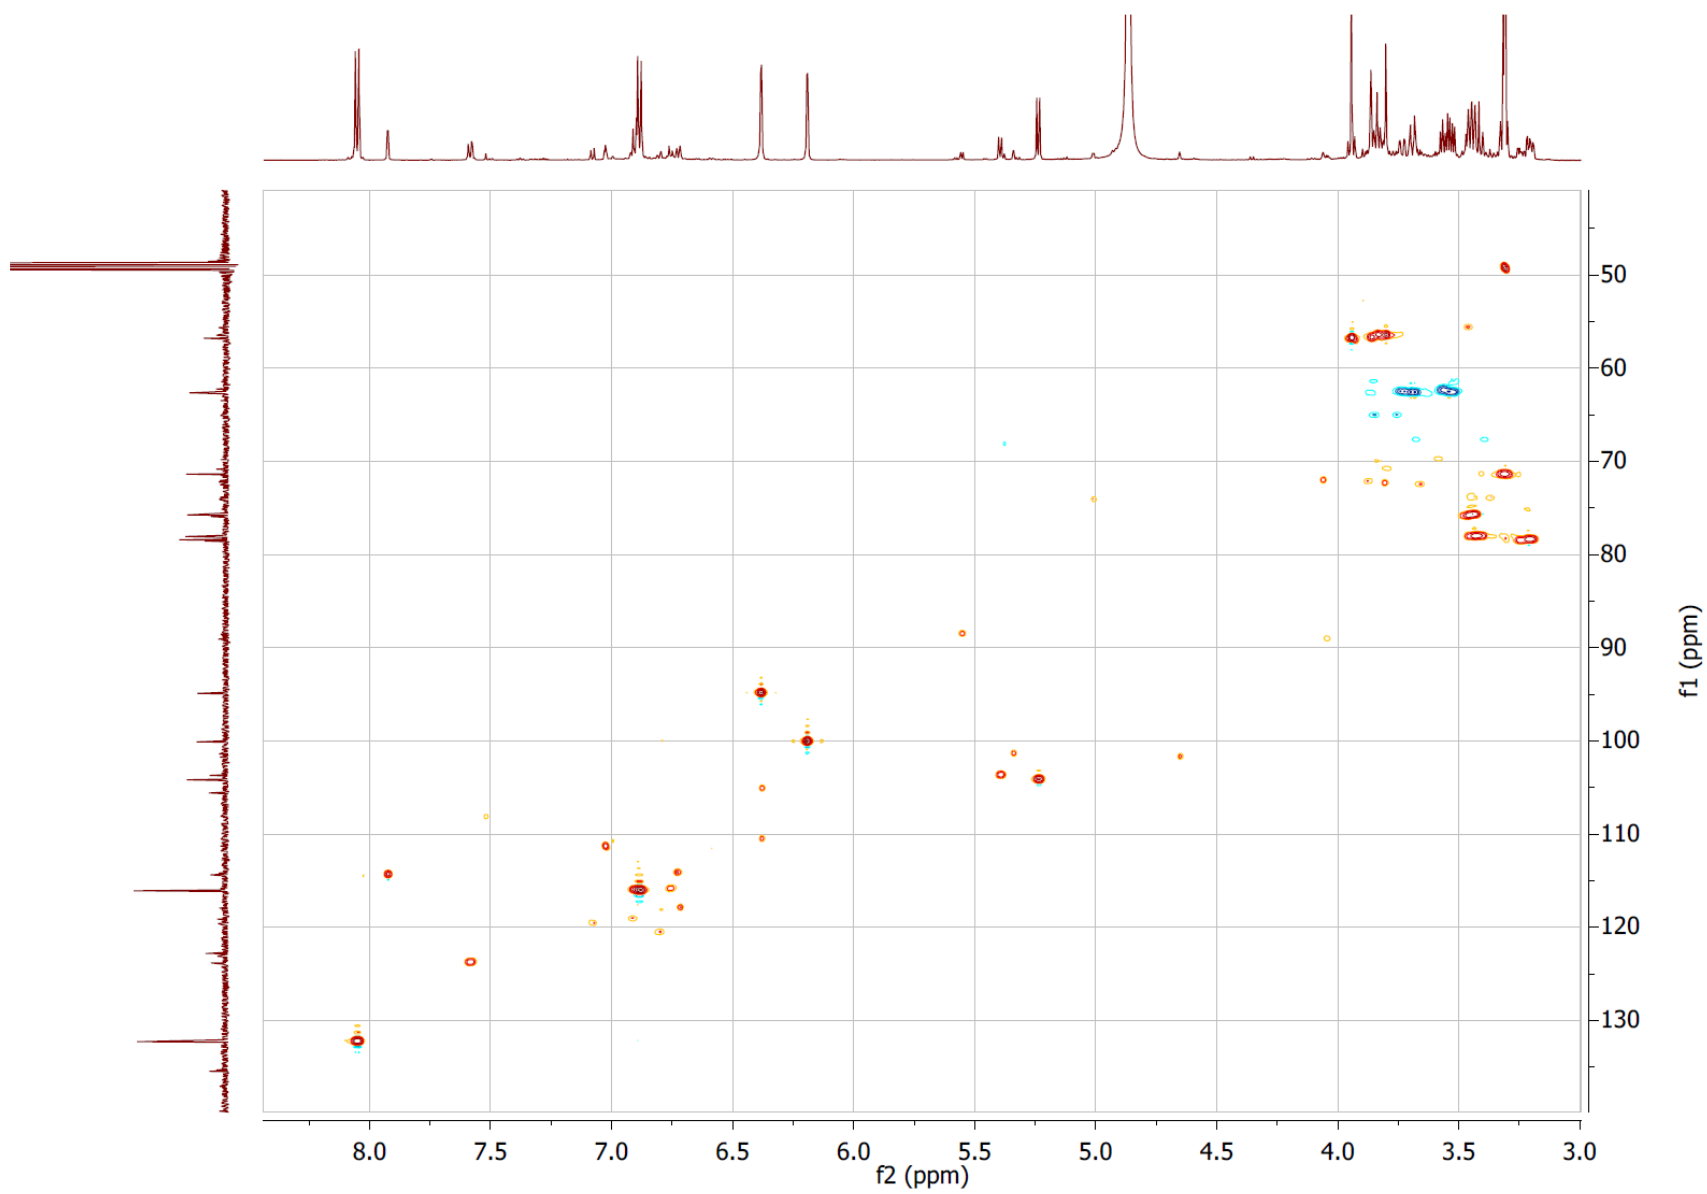

Figure S1e

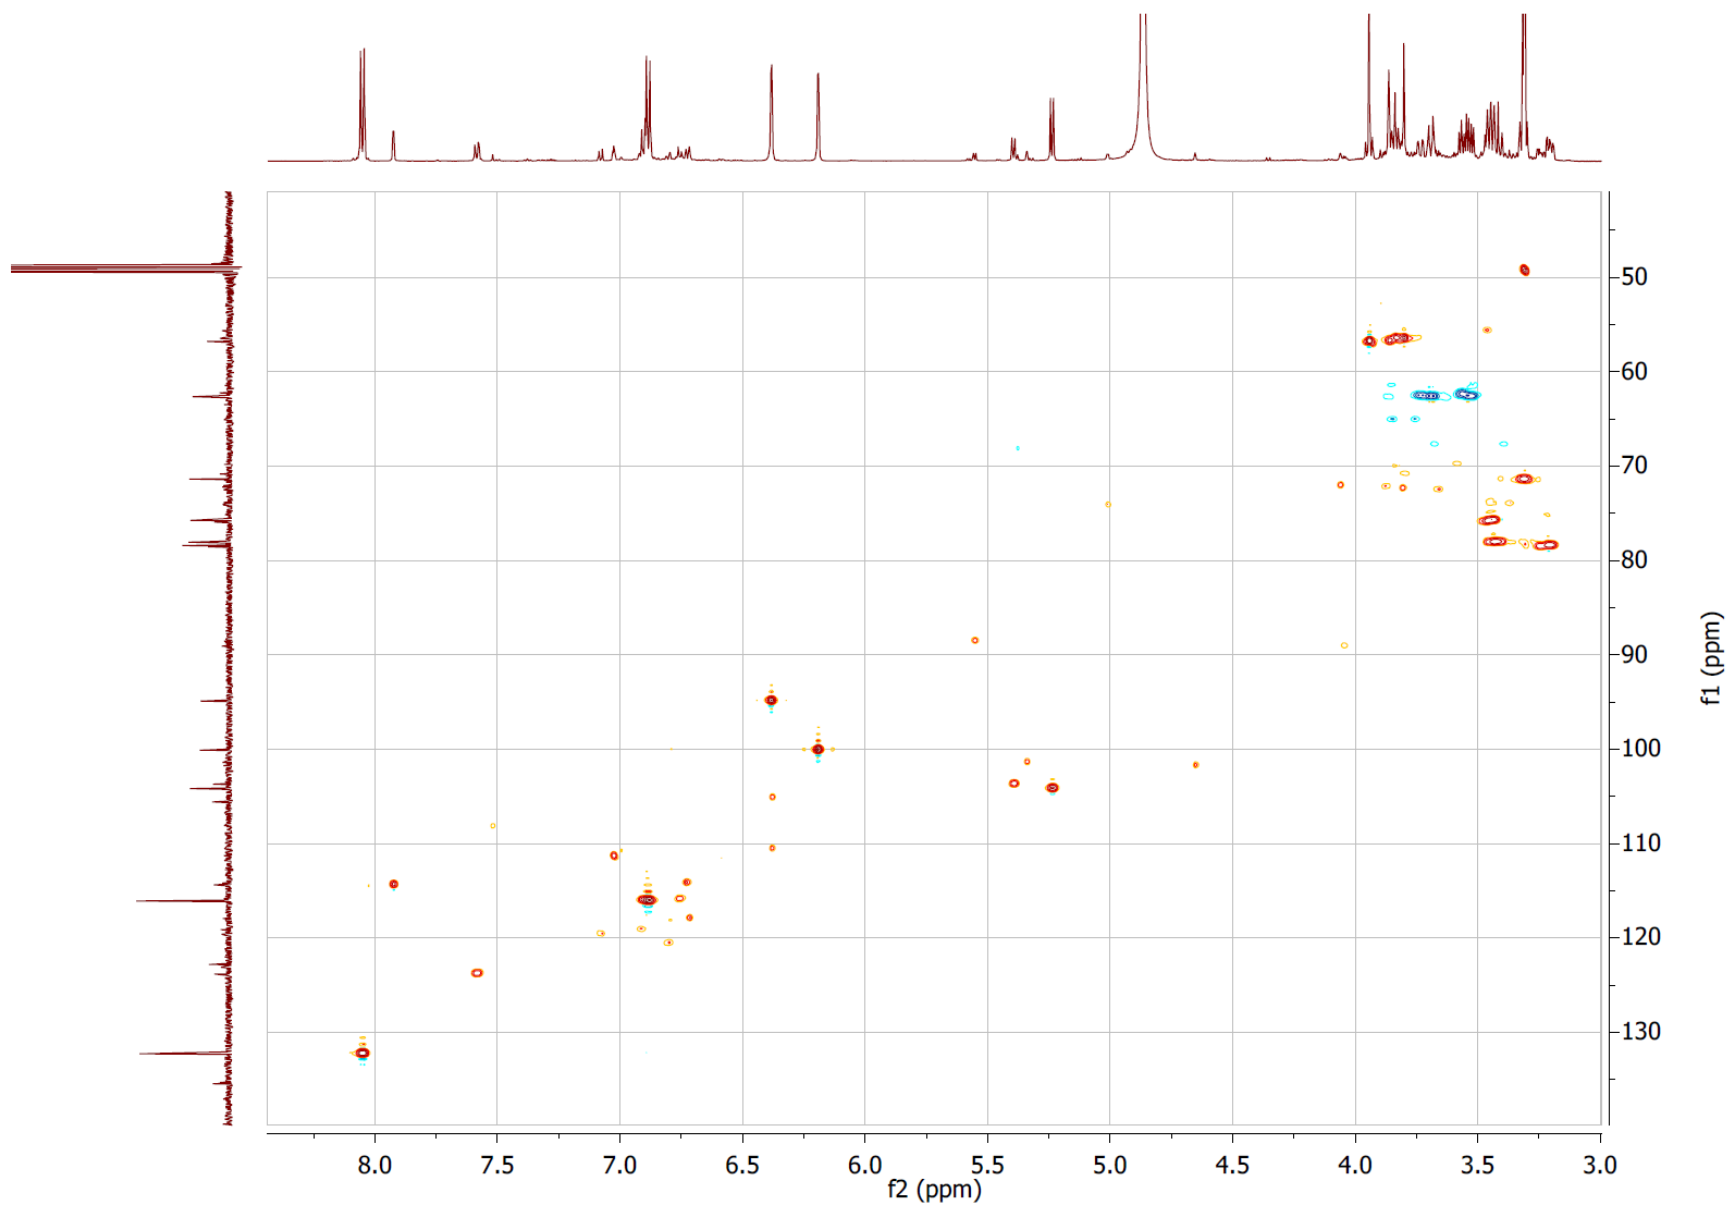

Figure S1f

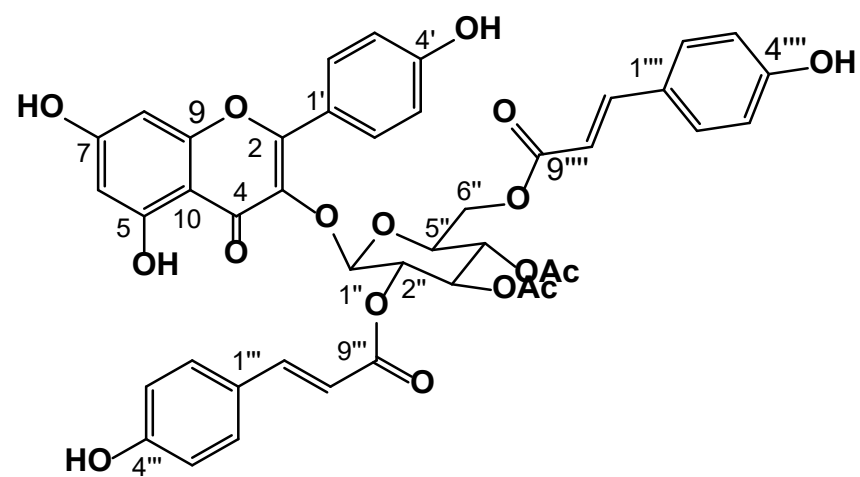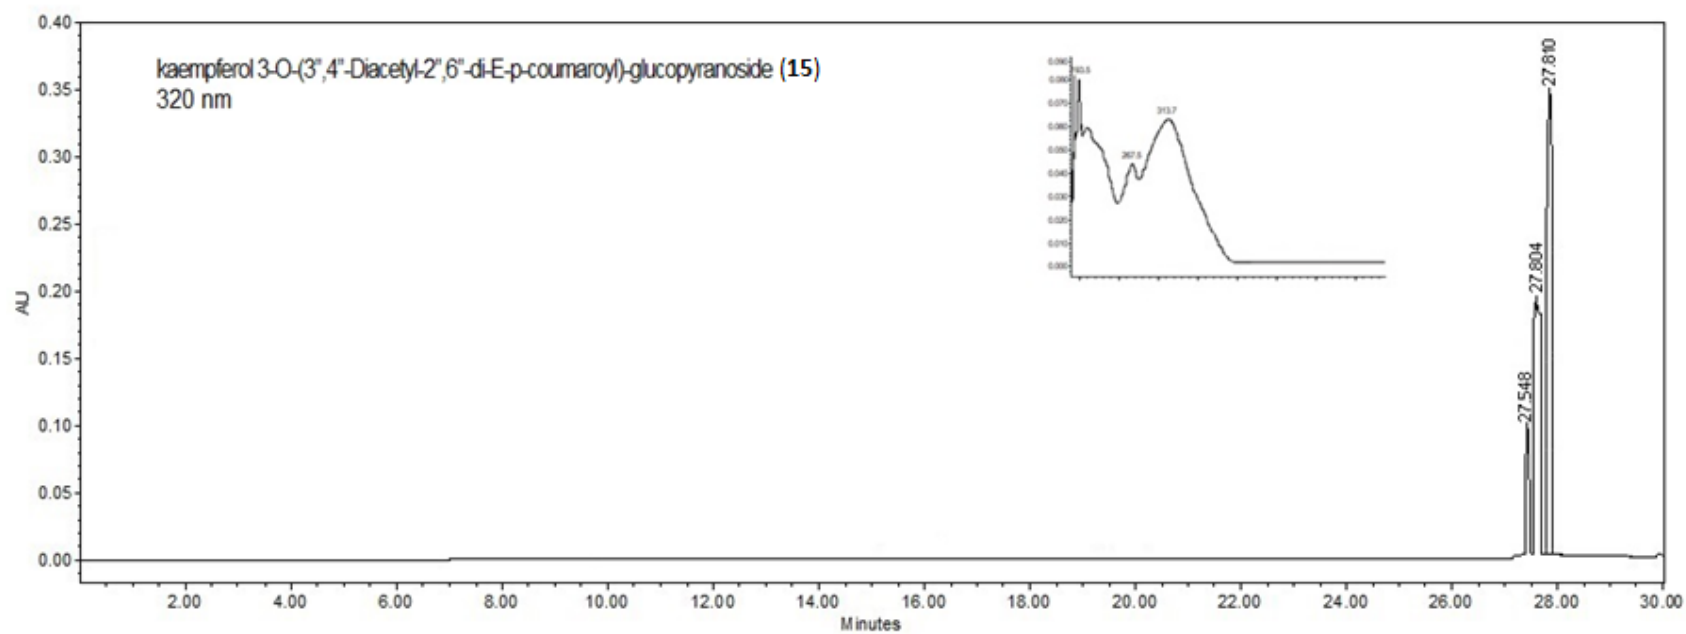

Figure S2a

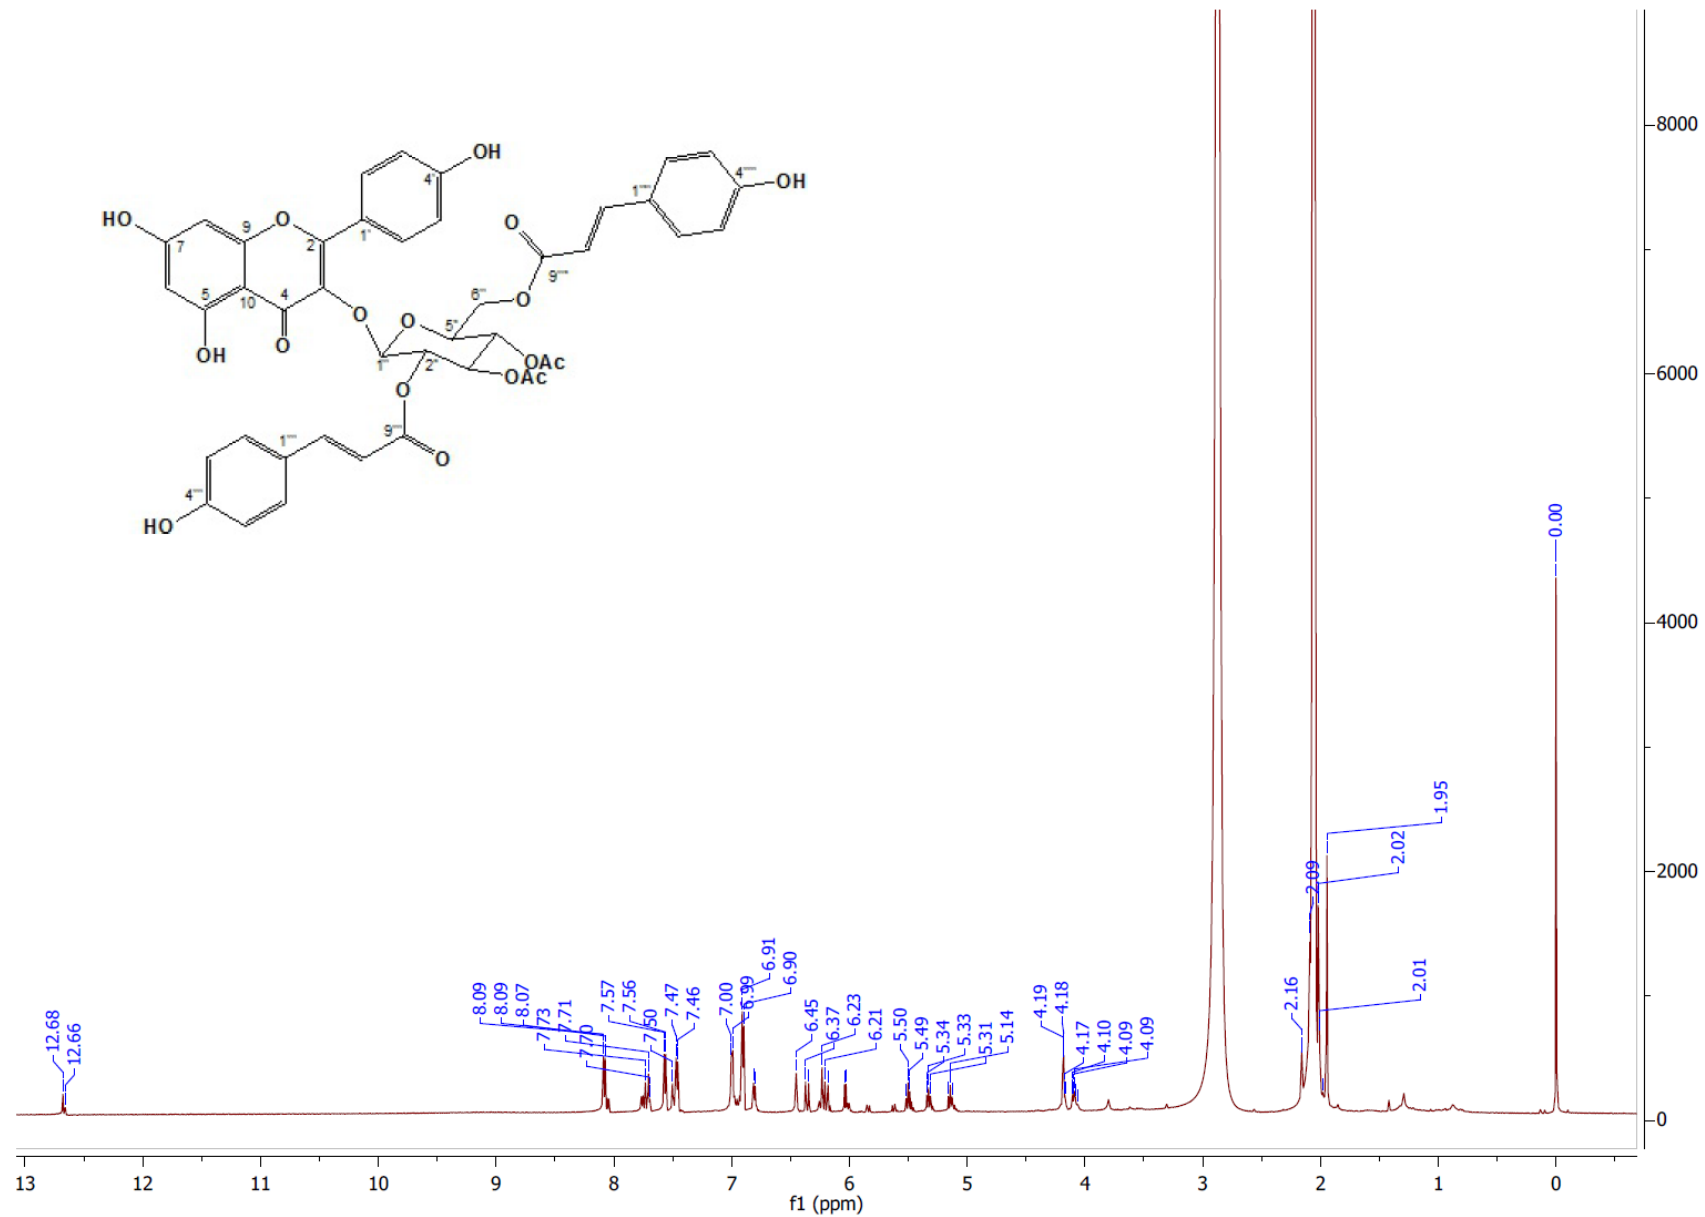

Figure S2b



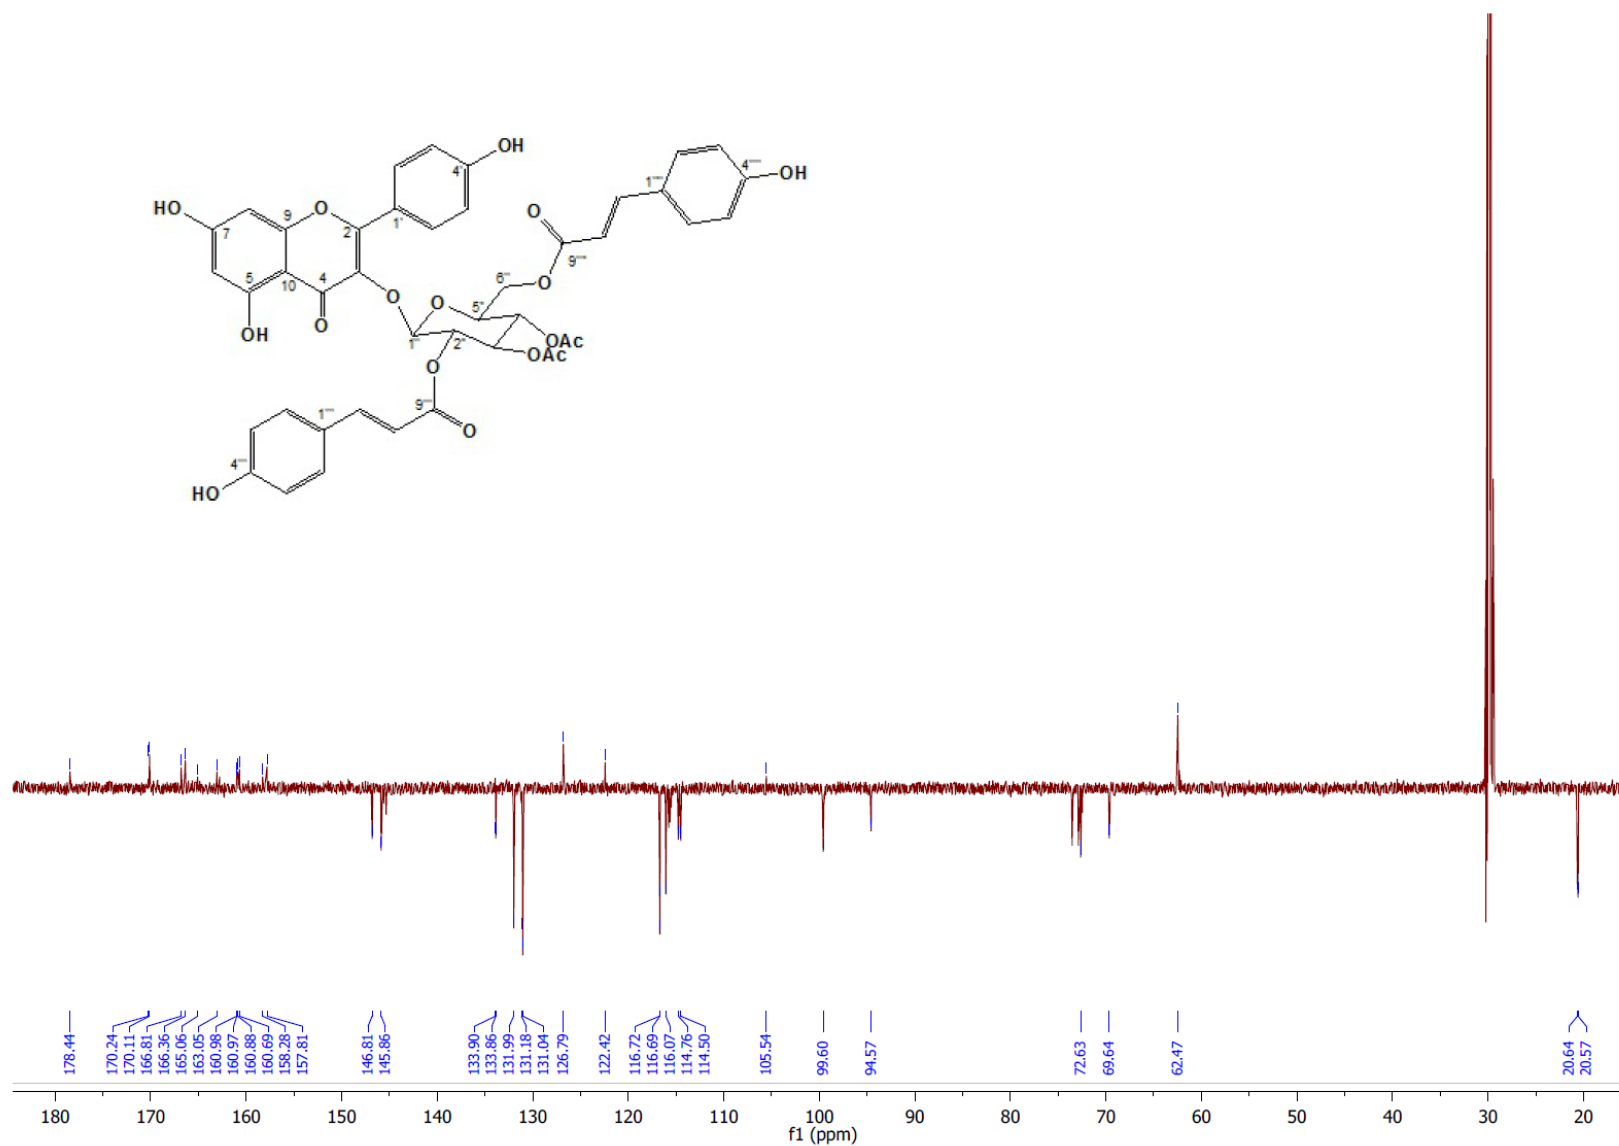

Figure S2c

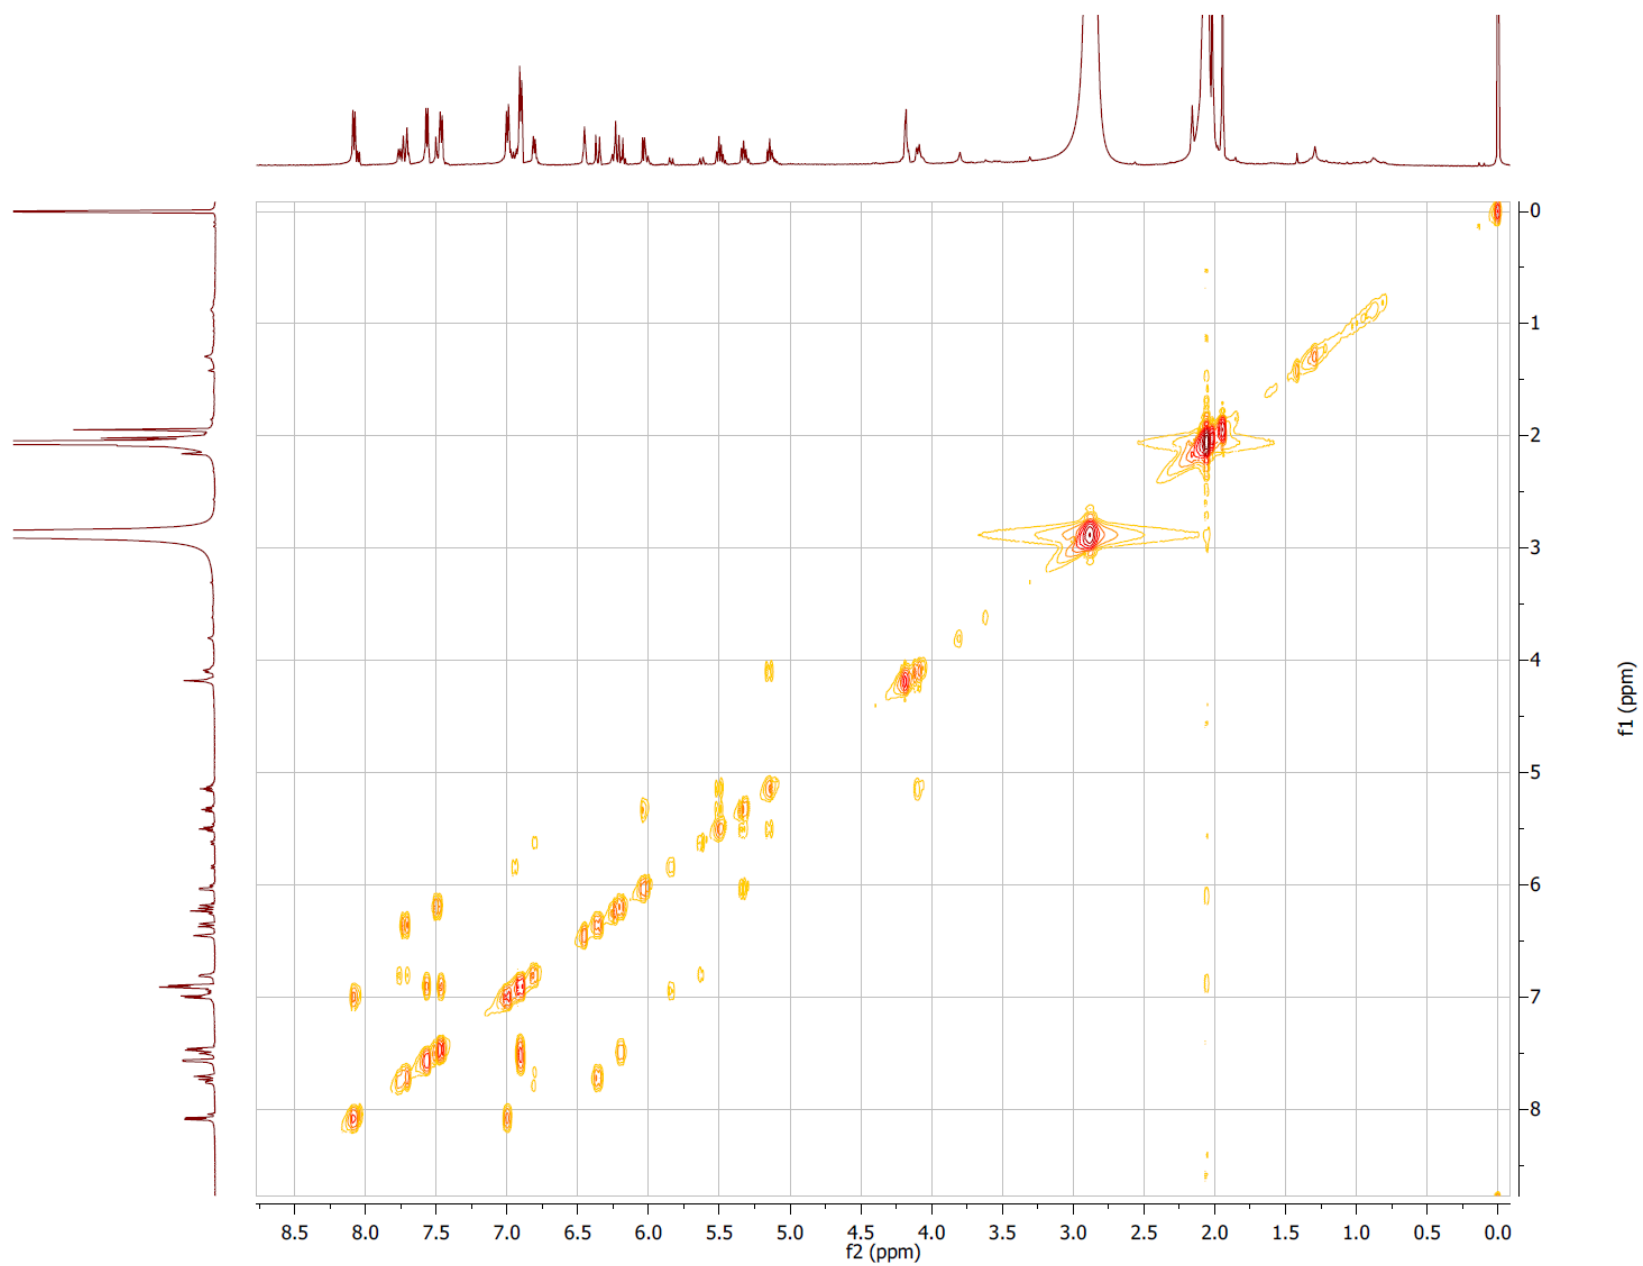

Figure S2d

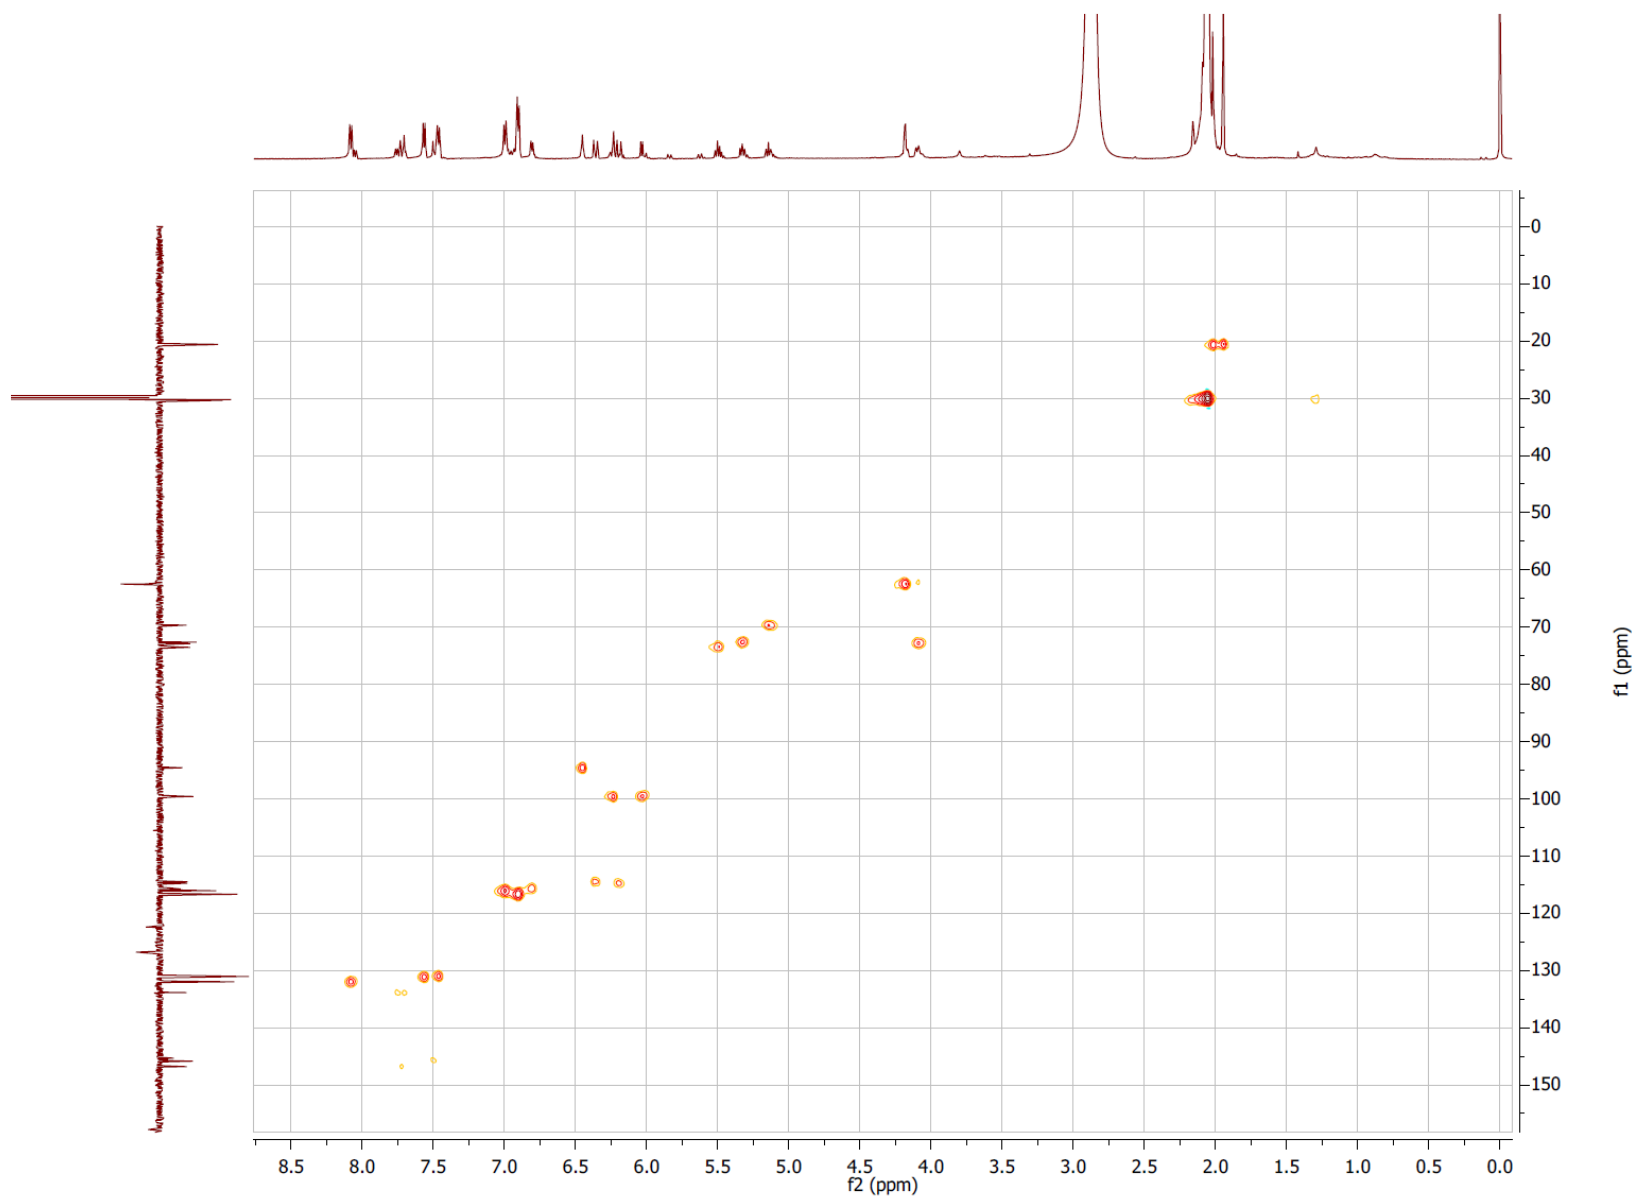

Figure S2e

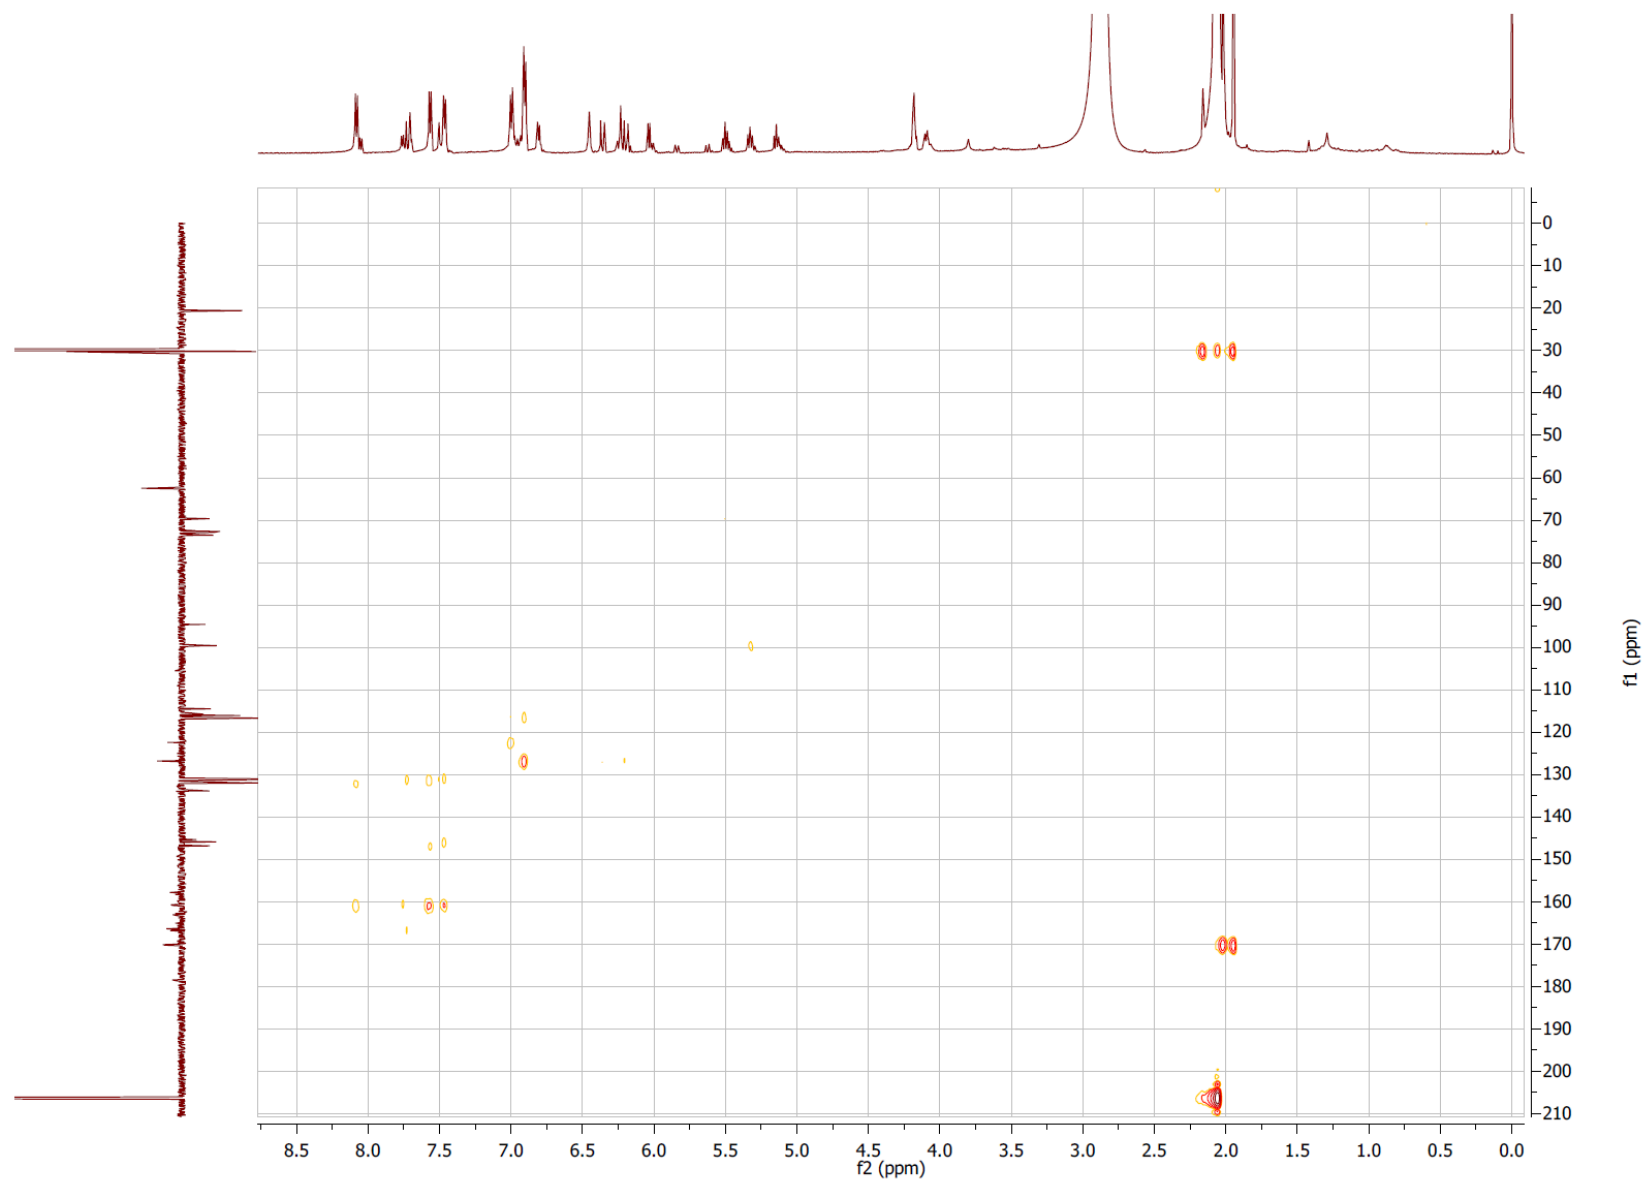

Figure S2f

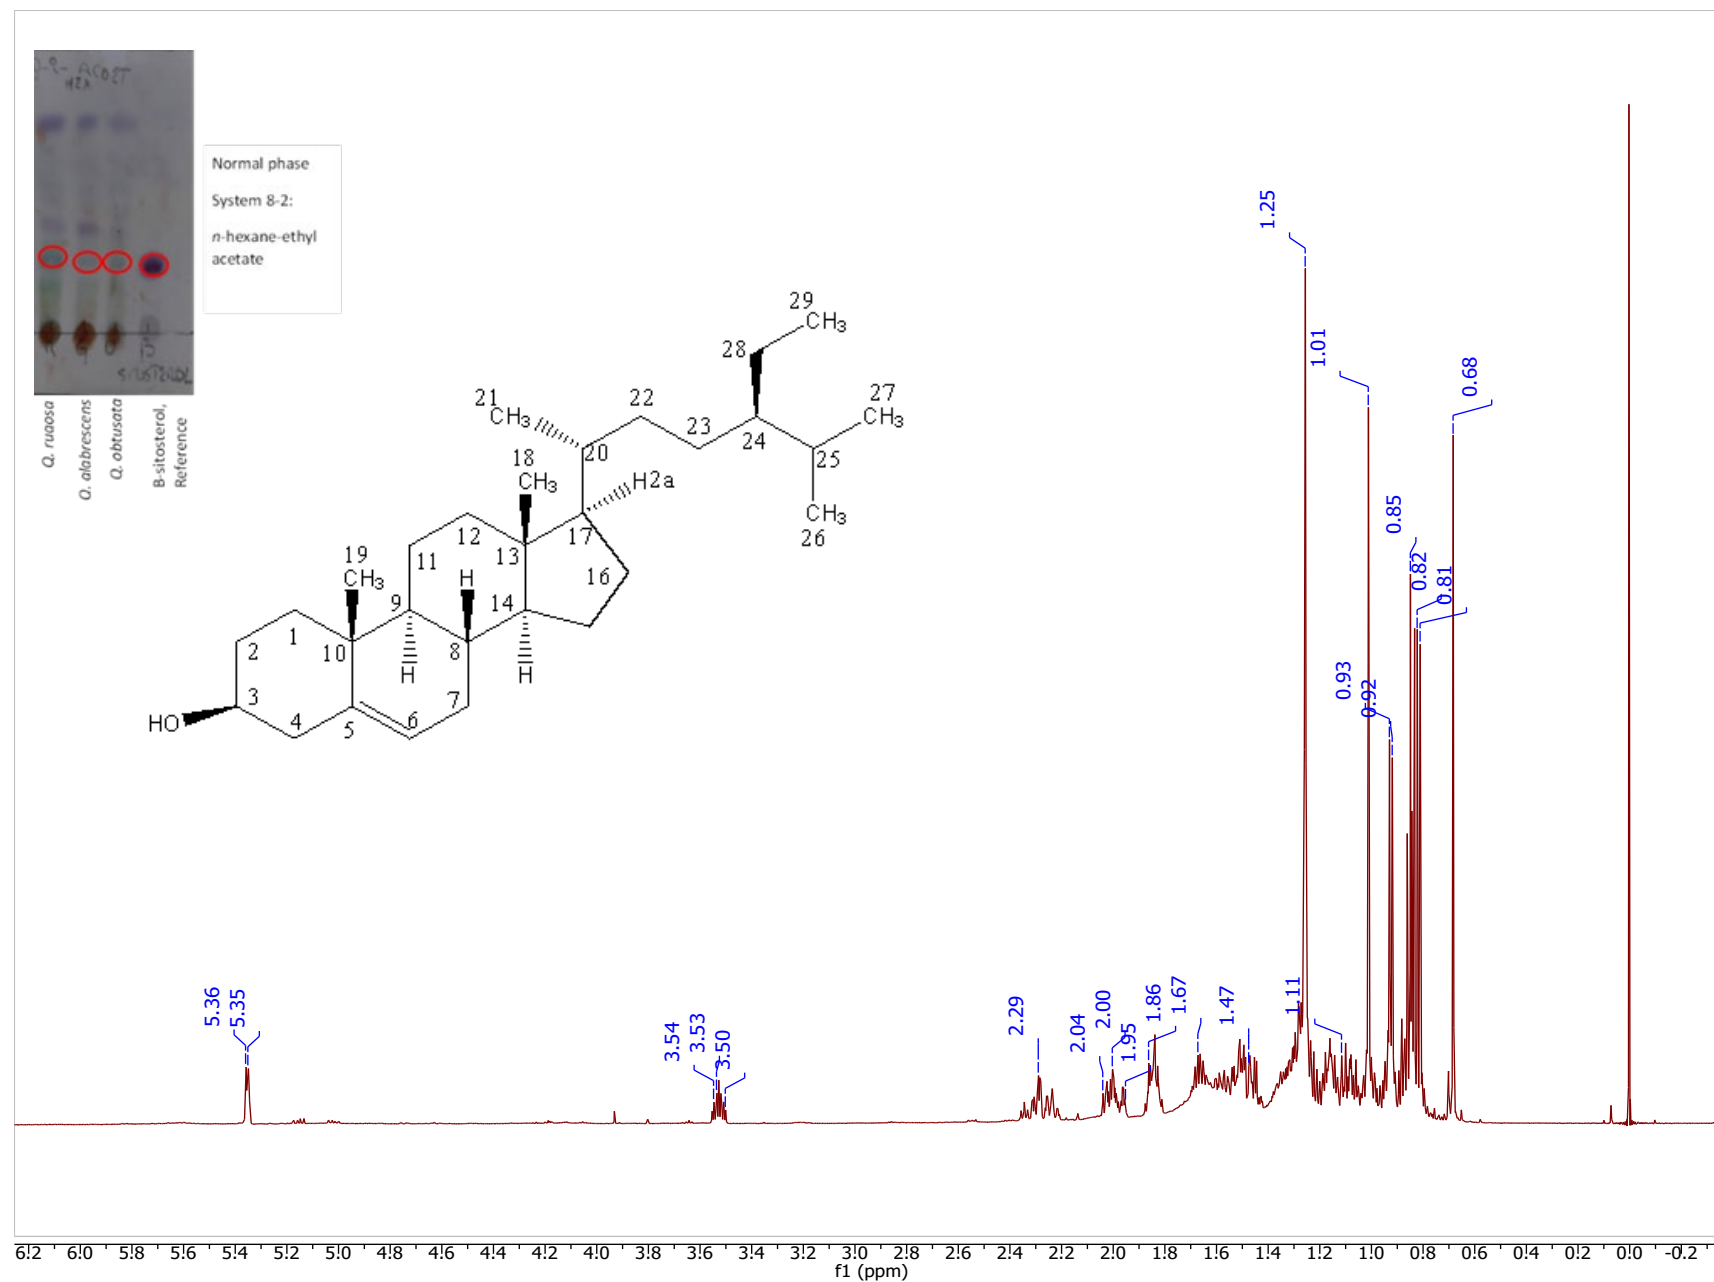

Figure S3a

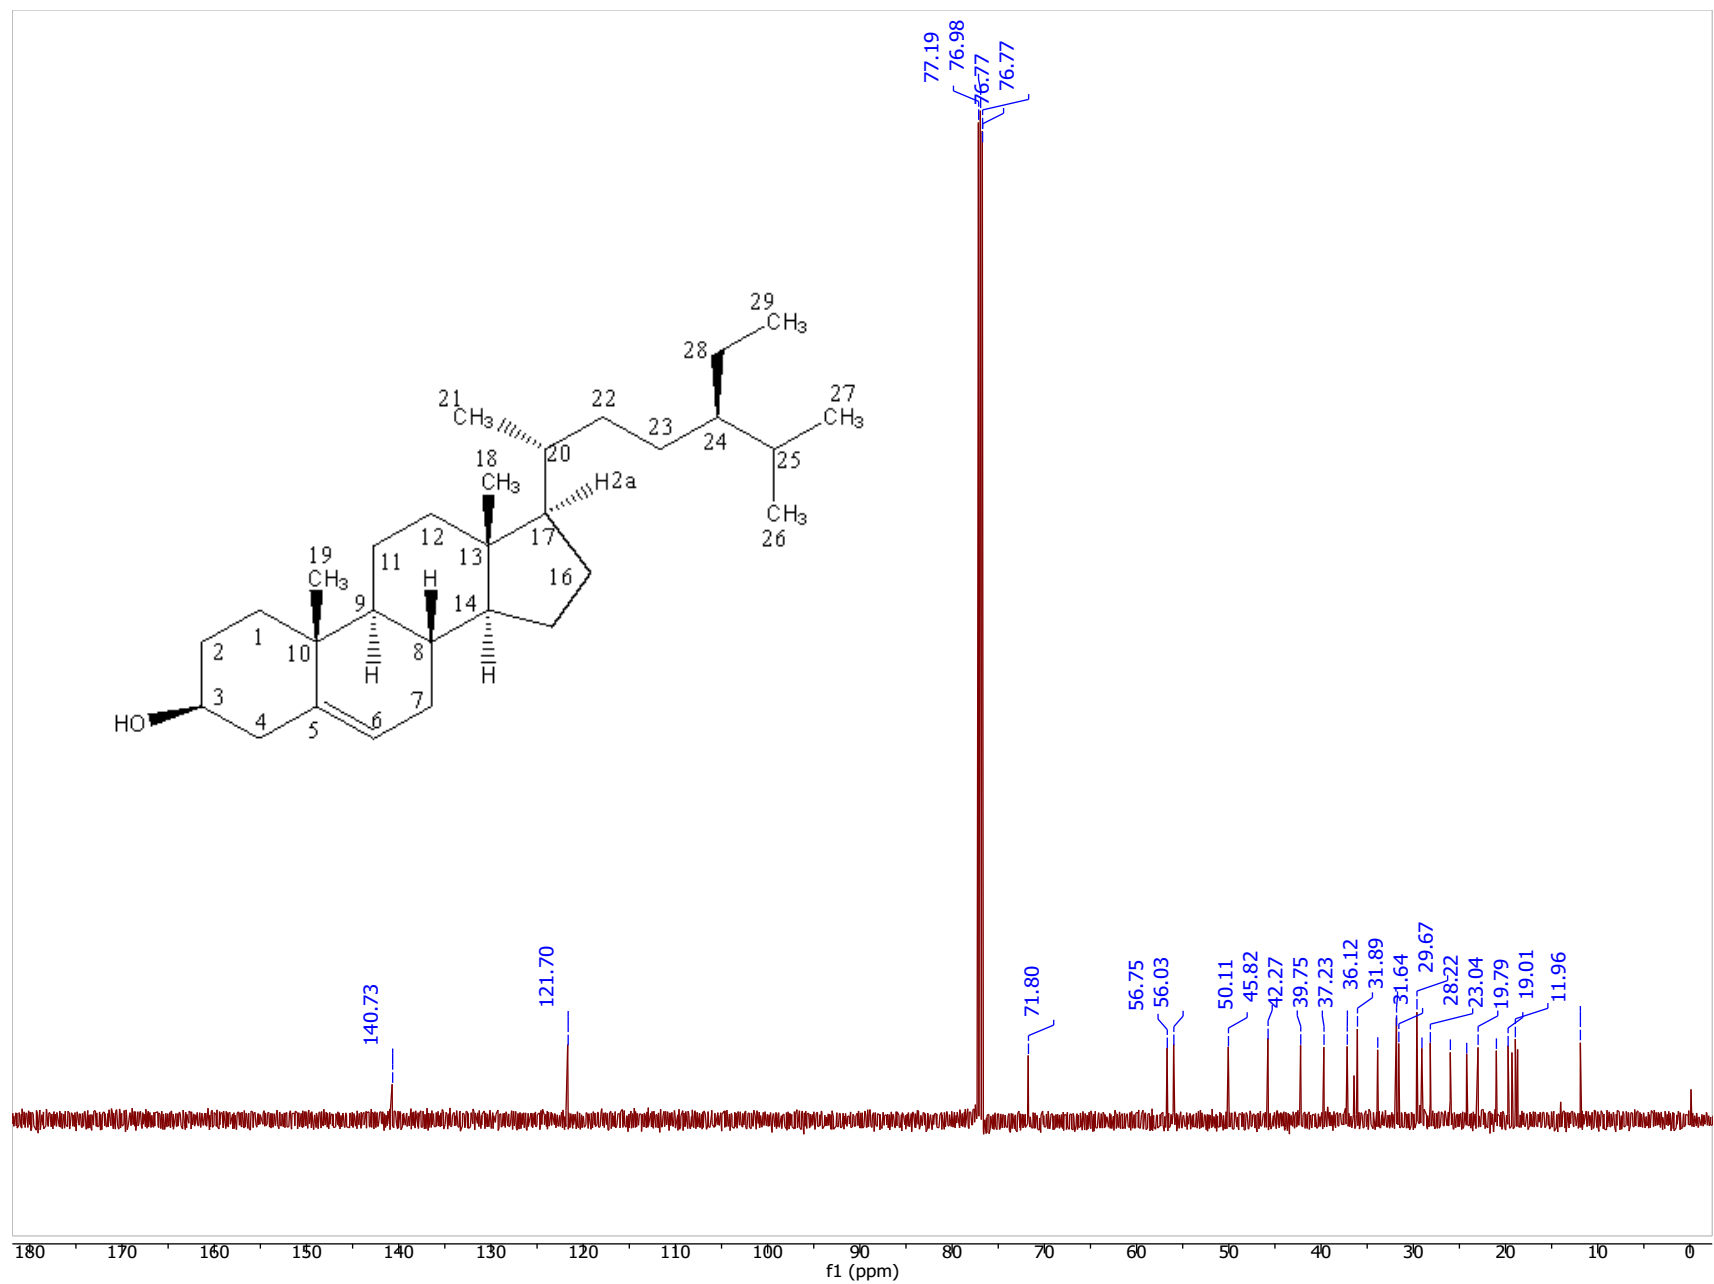

Figure S3b

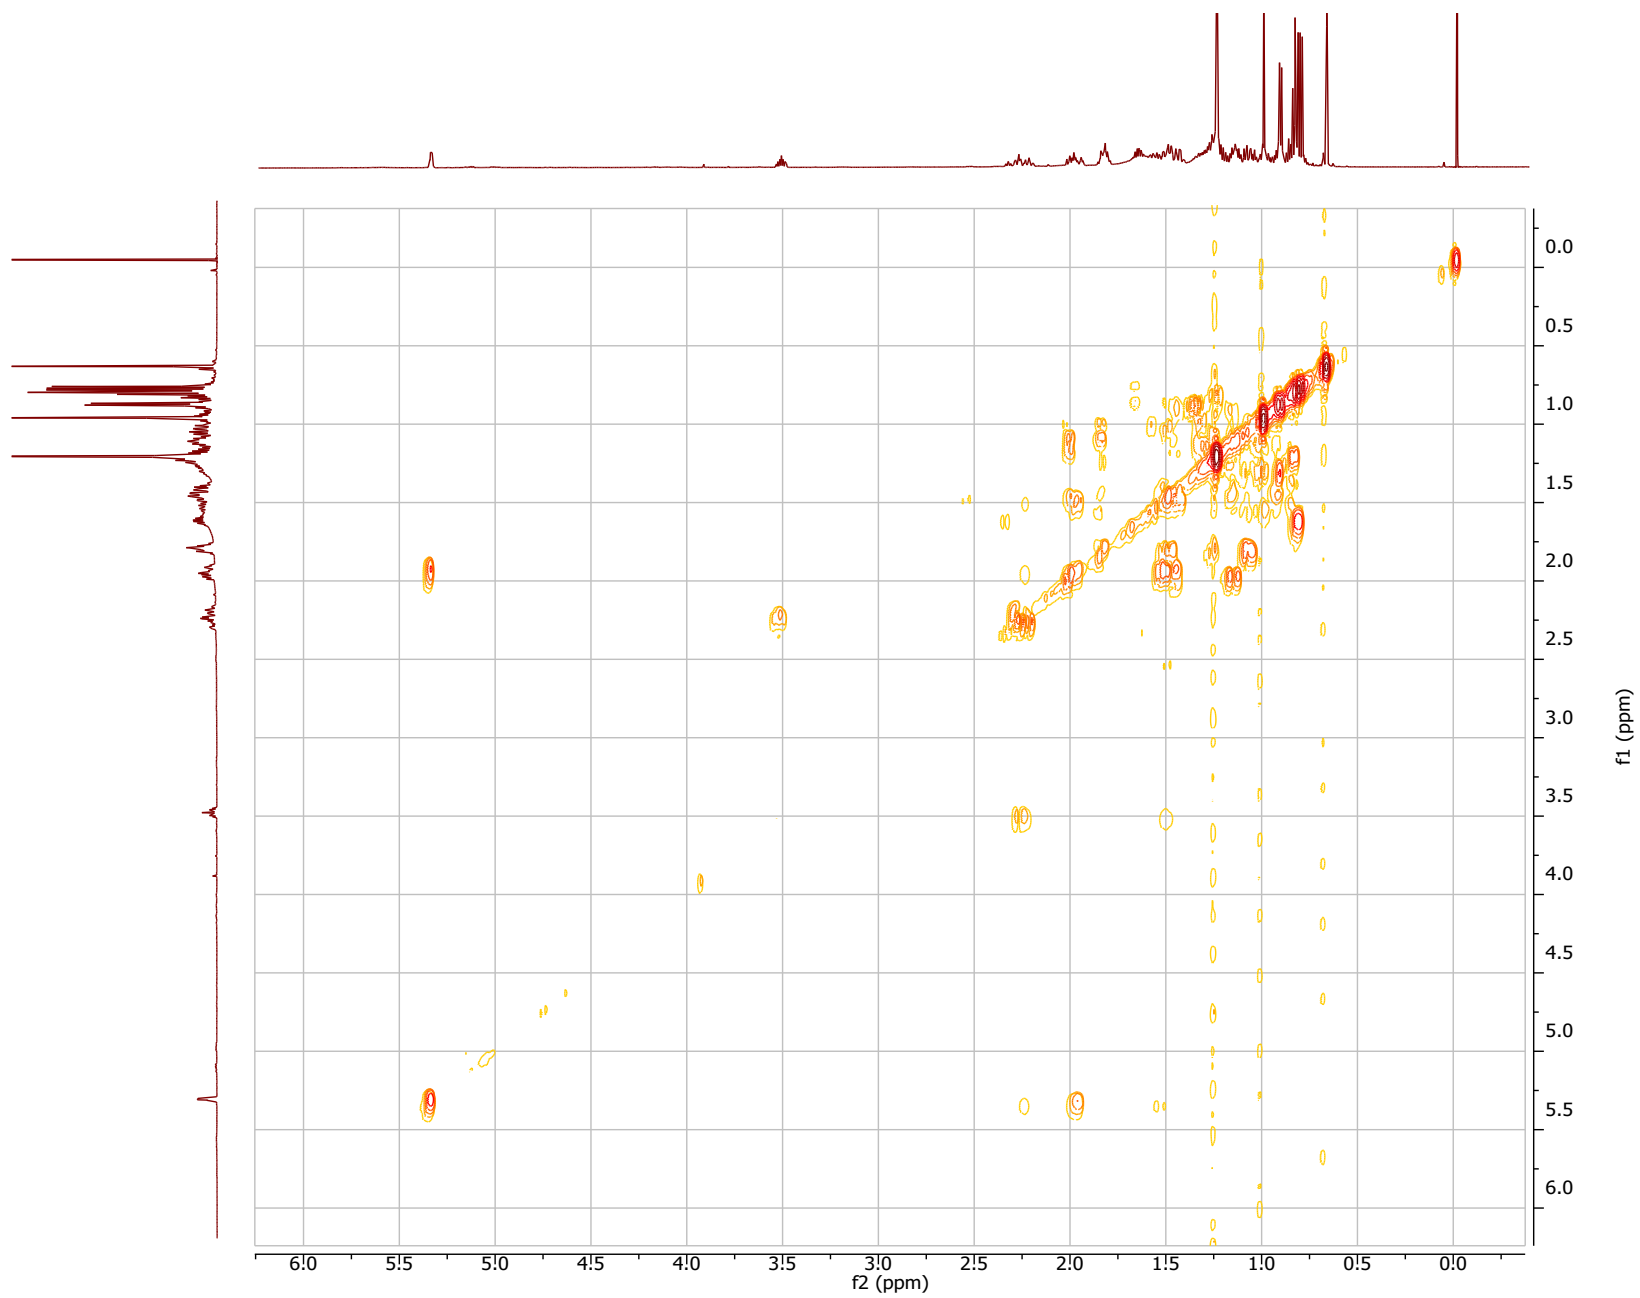

Figure S3c

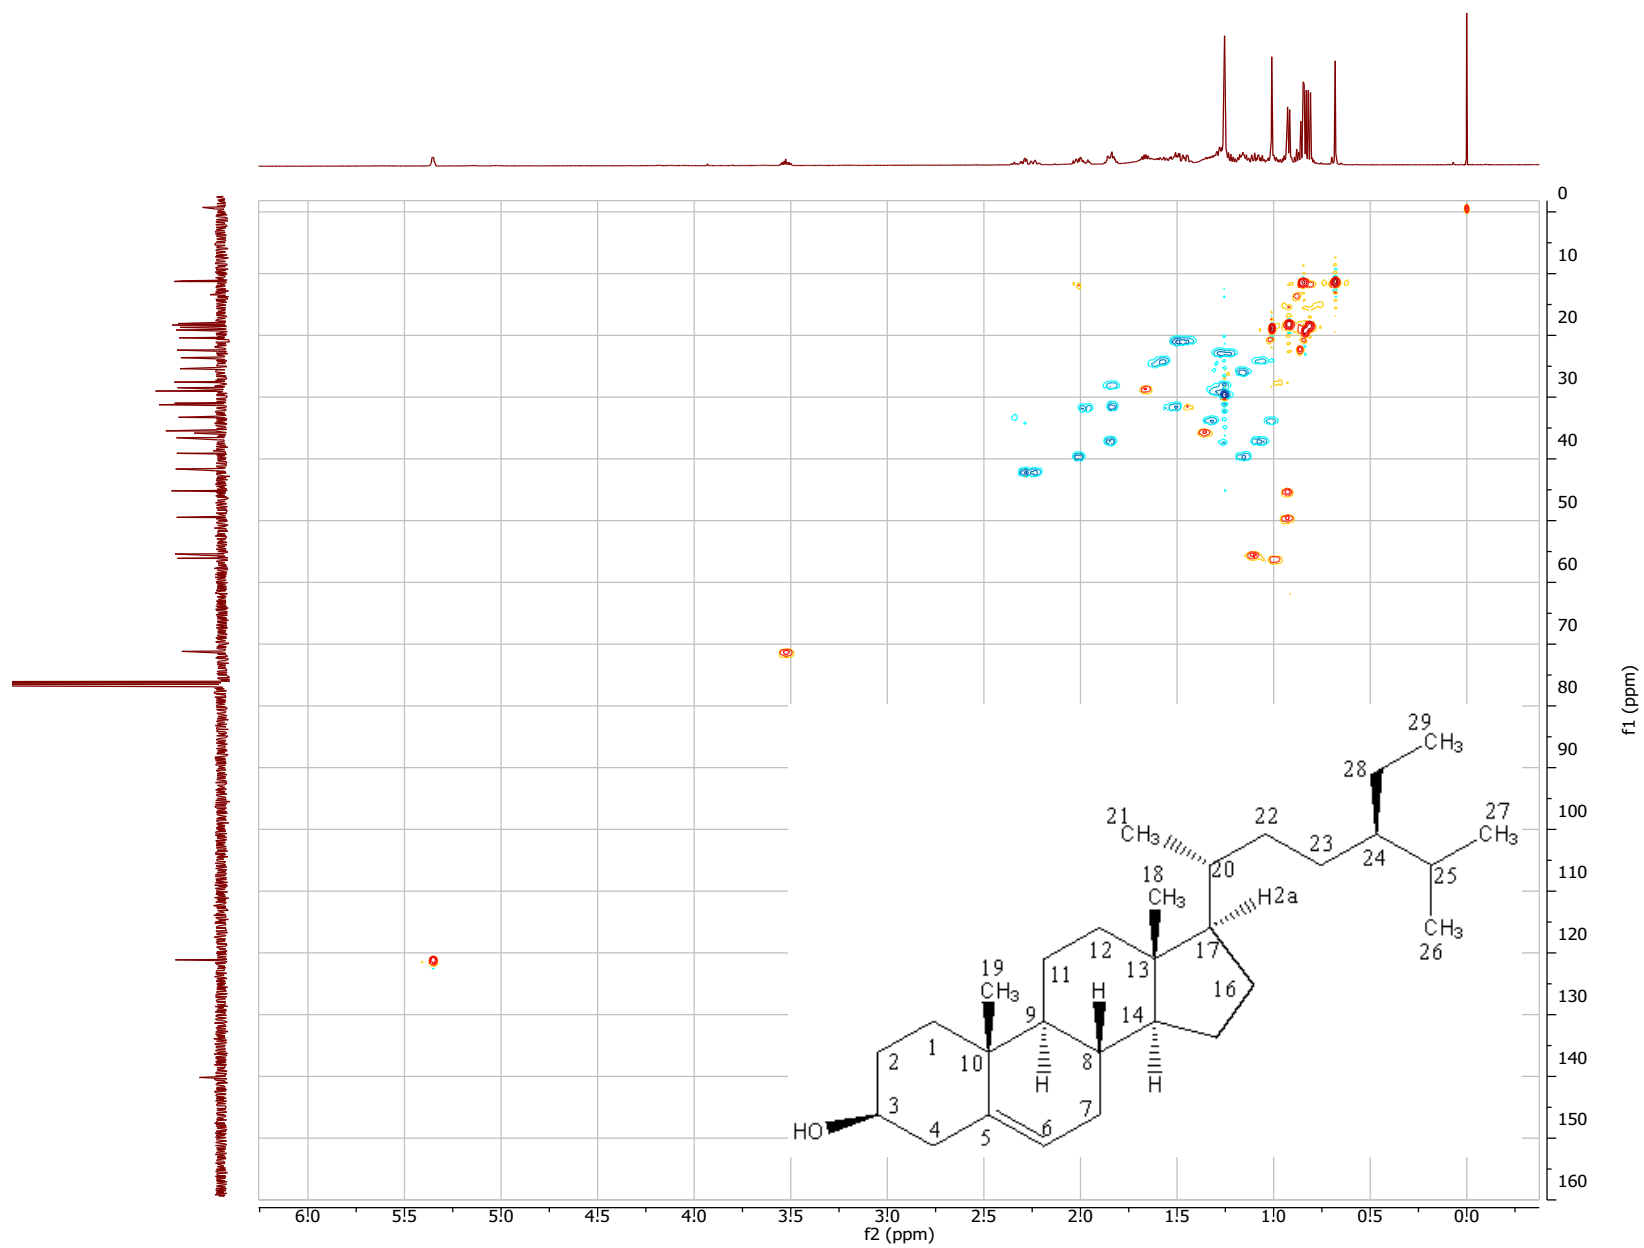

Figure S3d



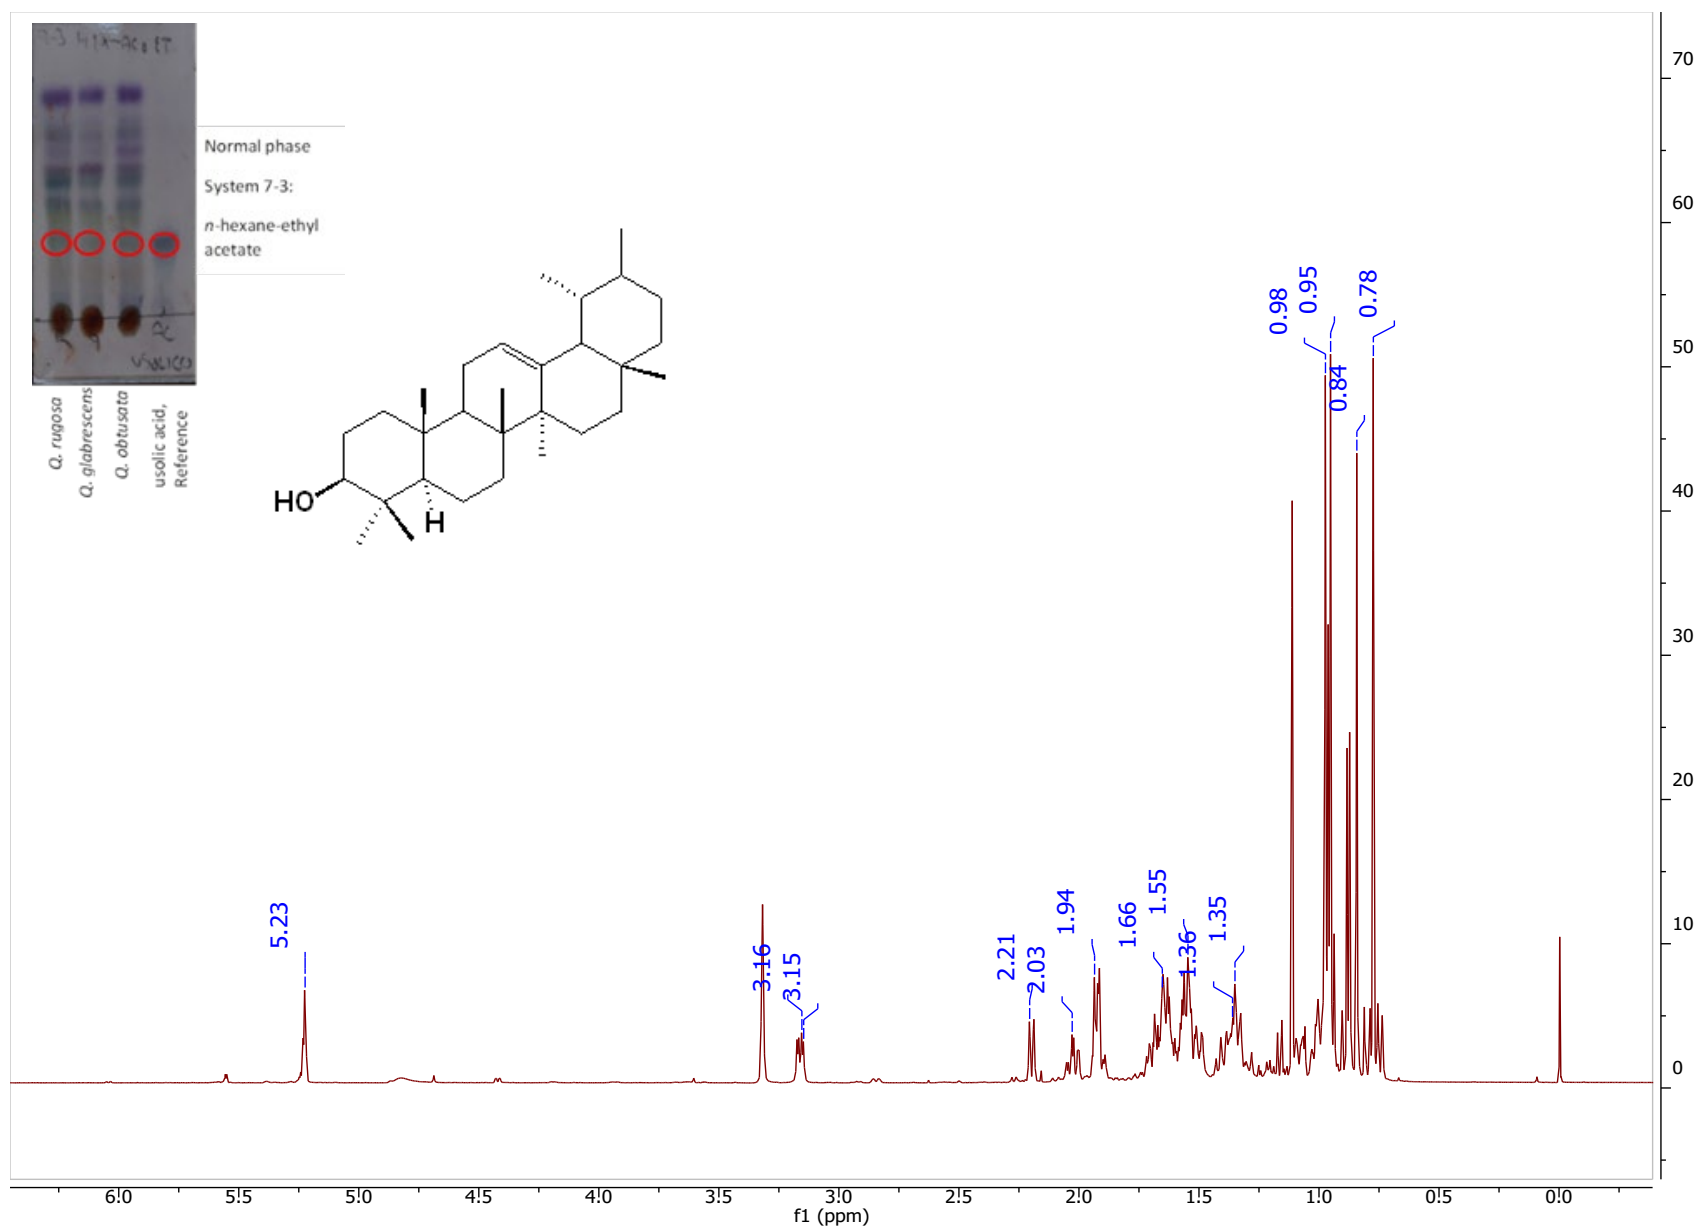

Figure S4

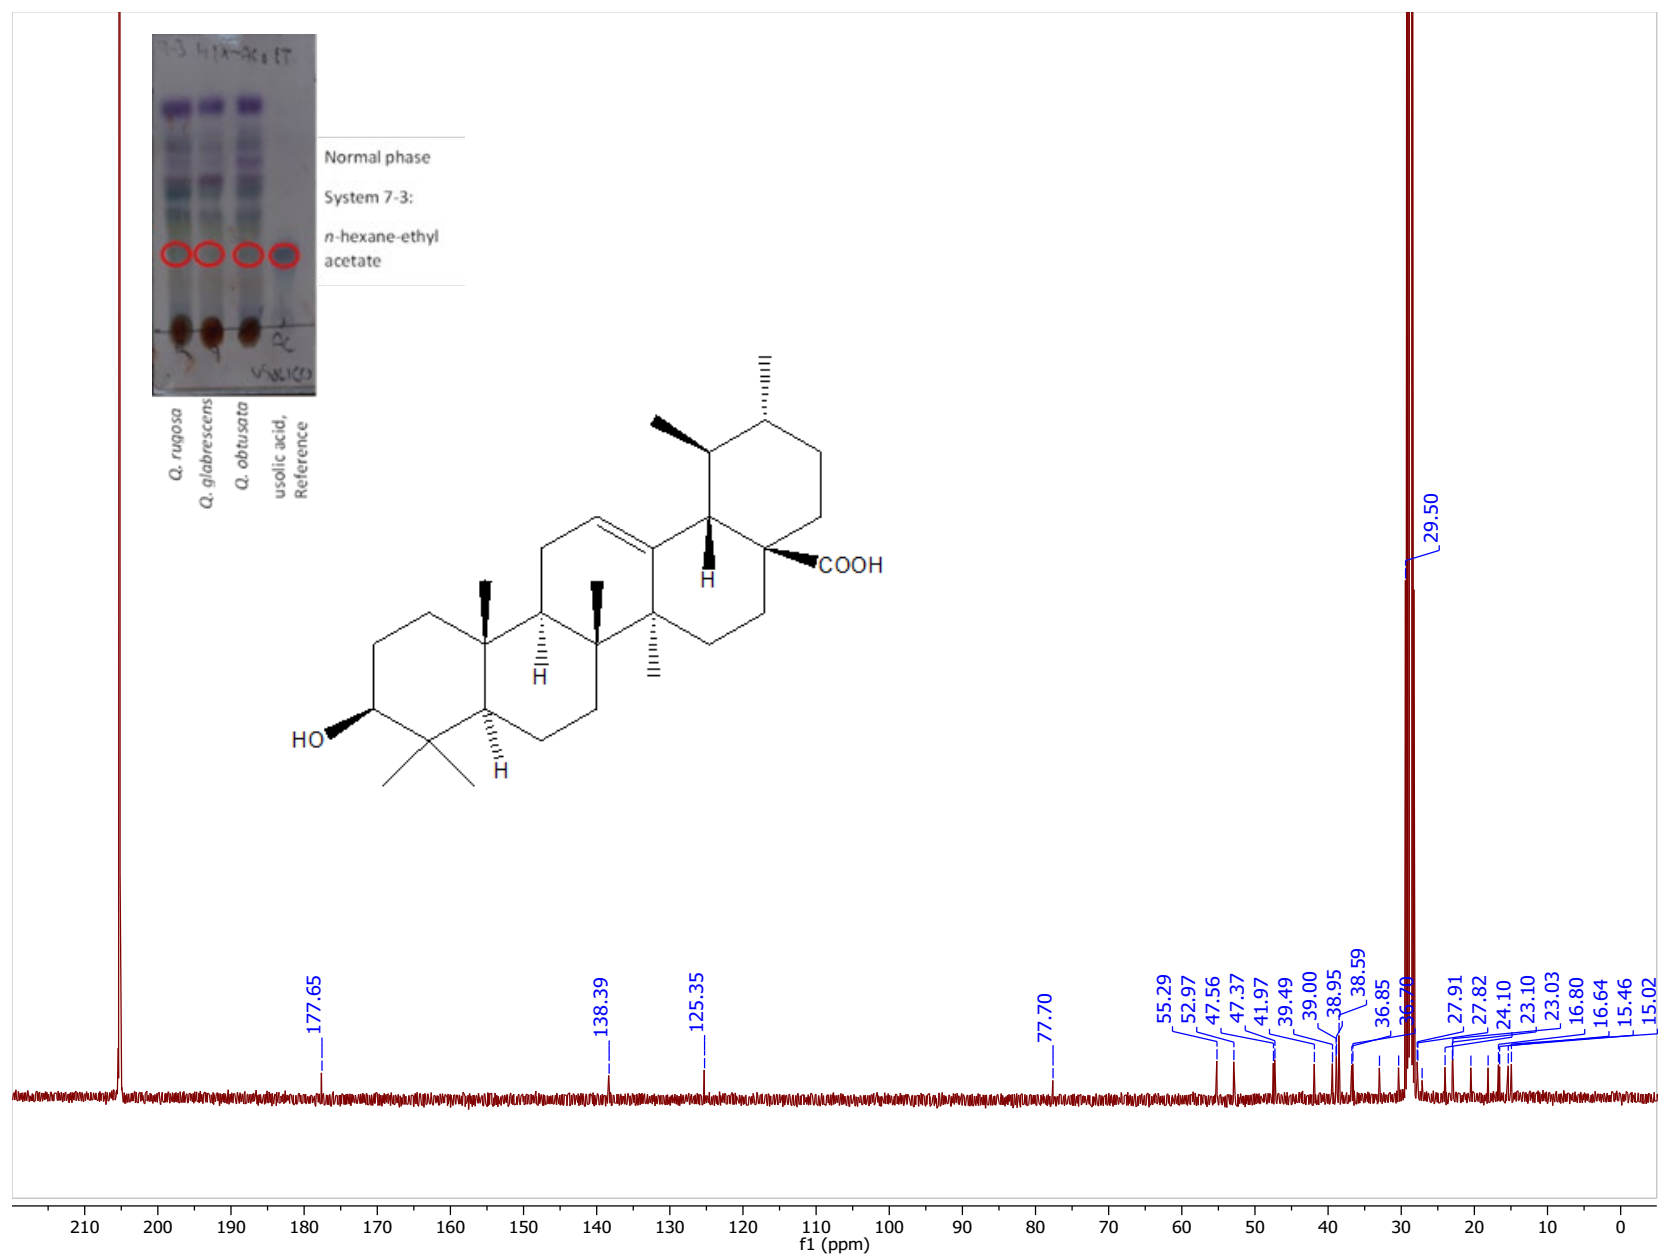

Figure S5
